# Supplementary material for: Stigmatisation of People with Deviant Sexual Interest: A Comparative Study
Source: MDPI journal article supplement (doi:10.3390/sexes4010002), 2022-12-22
Supplement: s1 [file s1]

Archive with 1 entries (1 files):
- sexes-1946403-supplementary.pdf
